# Supplementary material for: Global Identification of Small Ubiquitin-related Modifier (SUMO) Substrates Reveals Crosstalk between SUMOylation and Phosphorylation Promotes Cell Migration
Source: PubMed Central journal article supplement (PMC5930406; doi:10.1074/mcp.ra117.000014), 2018-02-08

Supplemental Figure 2

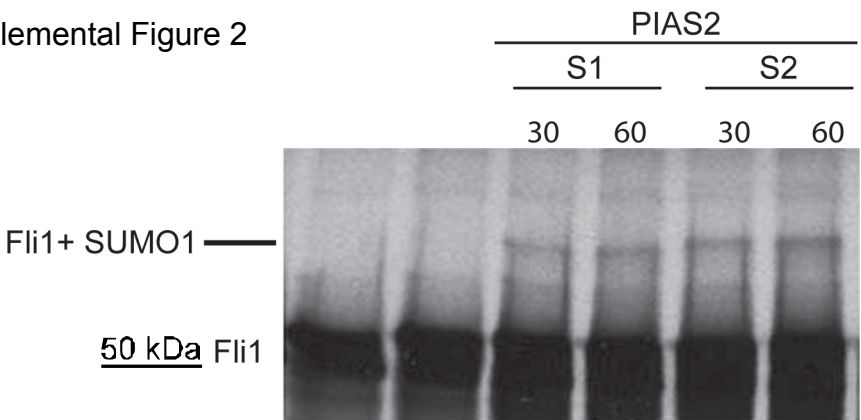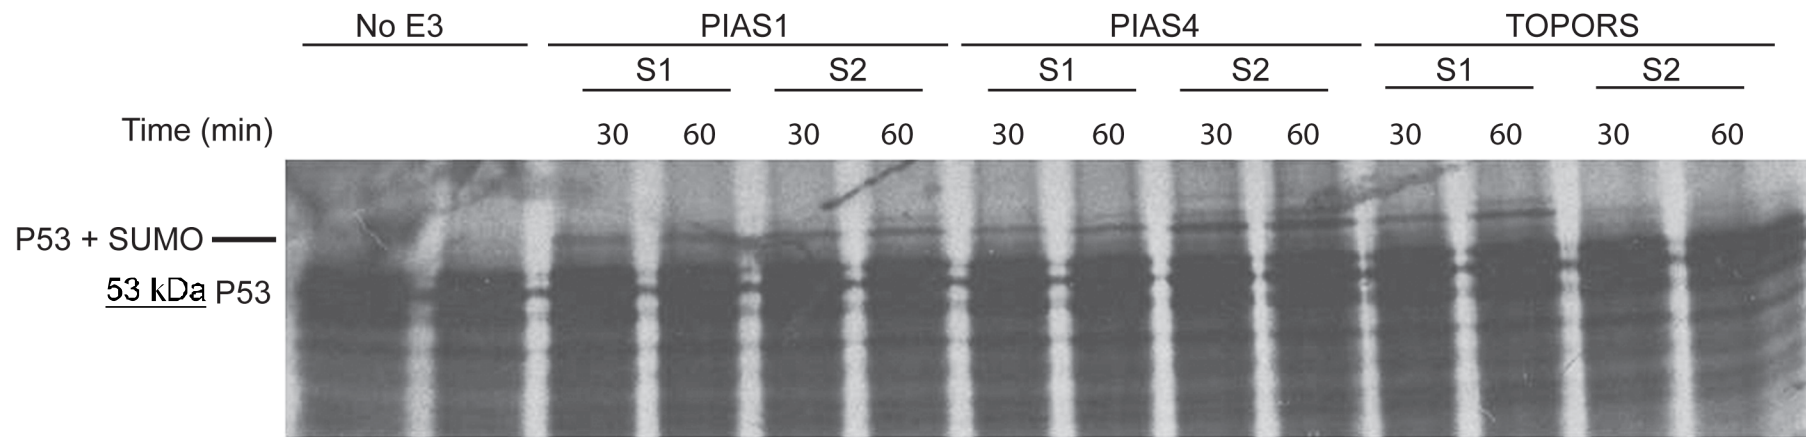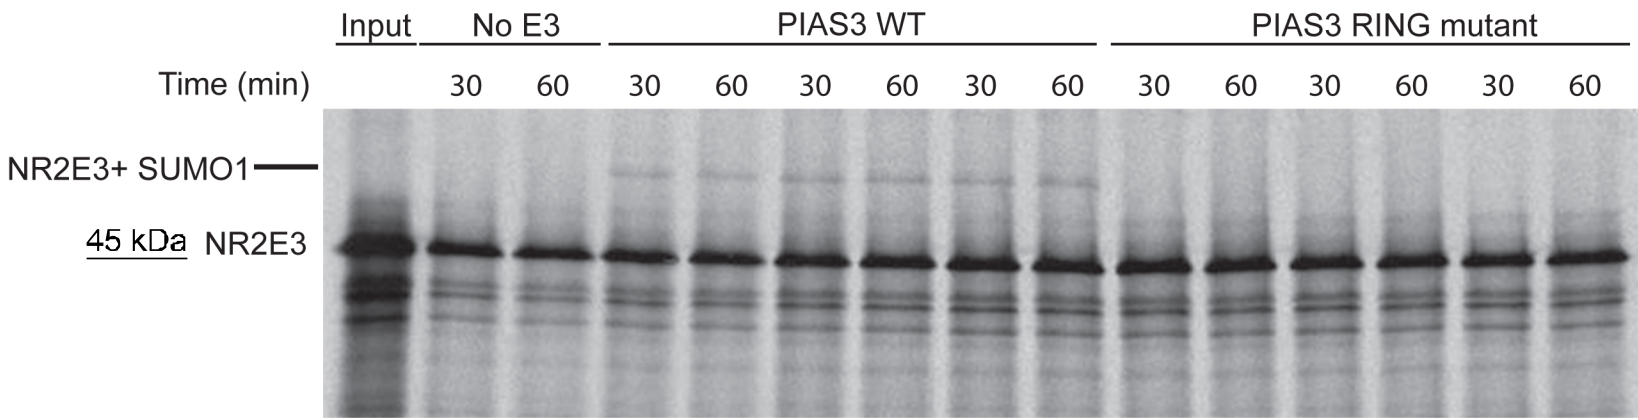

Supplement: supp_RA117.000014_4537_2_supp_64133_p3r18s.pdf [file supp_RA117.000014_4537_2_supp_64133_p3r18s.pdf]
