# Supplementary material for: Global Identification of Small Ubiquitin-related Modifier (SUMO) Substrates Reveals Crosstalk between SUMOylation and Phosphorylation Promotes Cell Migration
Source: PubMed Central journal article supplement (PMC5930406; doi:10.1074/mcp.ra117.000014), 2018-02-08

A

## Supplemental Figure 1

## Bar chart of Cellular Component categories

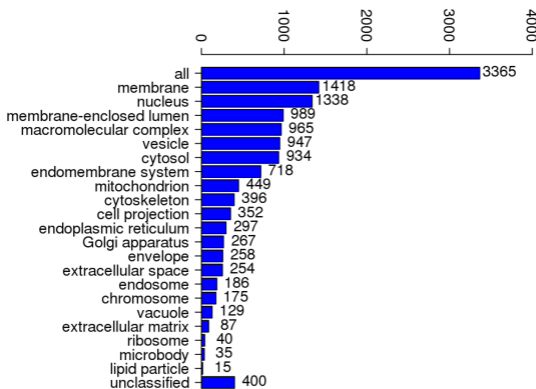

| Term    | GO ID      | #Genes in list | #Expected | Enrichment | P value | FDR |
|---------|------------|----------------|-----------|------------|---------|-----|
| Nucleus | GO:0005634 | 1338           | 520       | 2.57       | 0       | 0   |

B

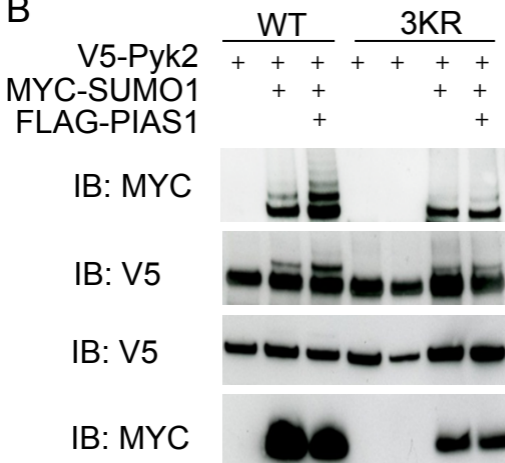

C

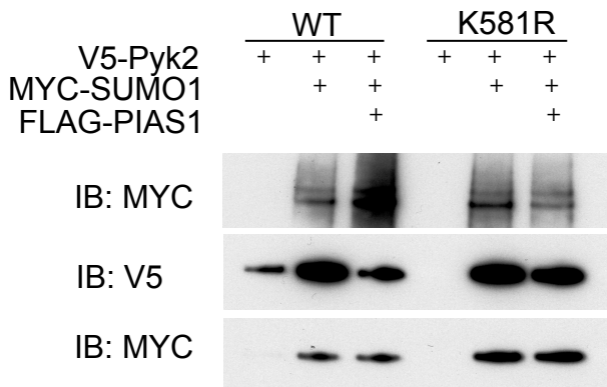

Supplement: supp_RA117.000014_4537_2_supp_64141_p3rs8s.pdf [file supp_RA117.000014_4537_2_supp_64141_p3rs8s.pdf]
